# Supplementary material
Source: Springer Nature journal article supplement (https://www.springermedizin.de/resource/supplementary/12974_2008_172_MOESM4_ESM.pdf/9600958)

DAPI nuclear stain

TUNEL

Wild-type

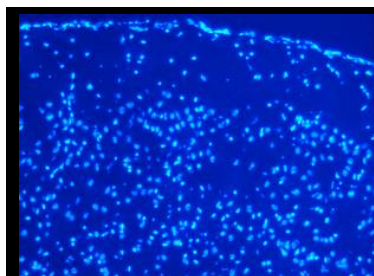

Cortex

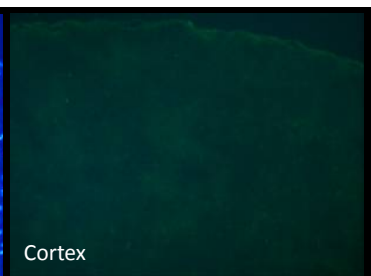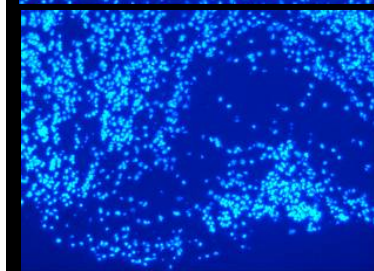

Contusion zone

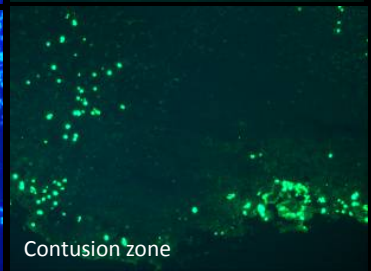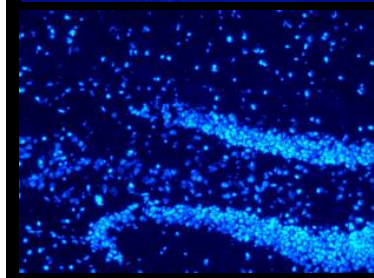

Hippocampus

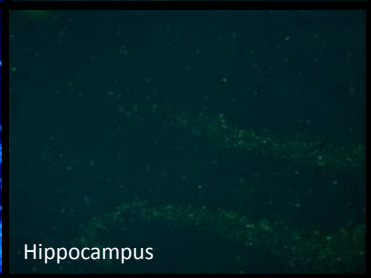

CD59a<sup>-/-</sup>

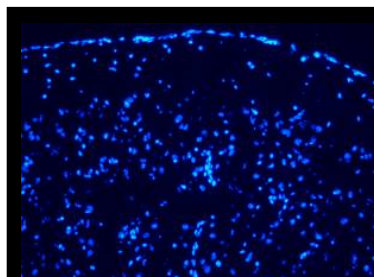

Cortex

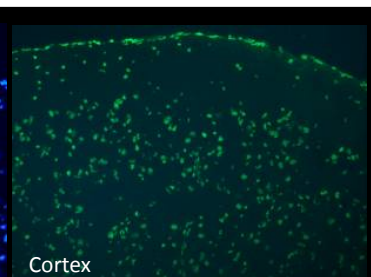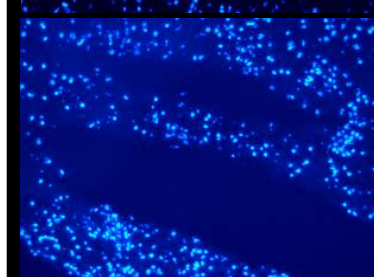

Contusion zone

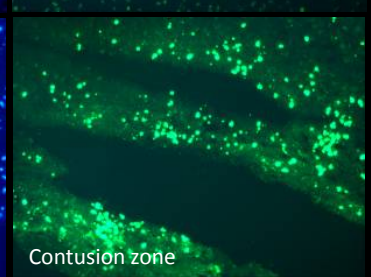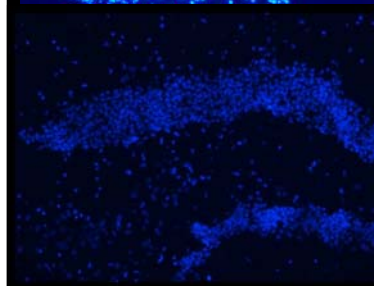

Hippocampus

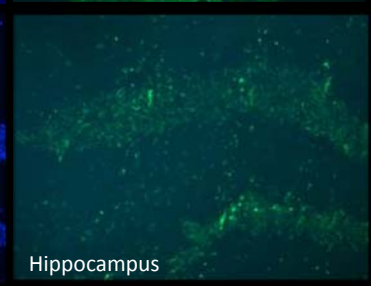

NeuN

TUNEL

CD59a<sup>-/-</sup>

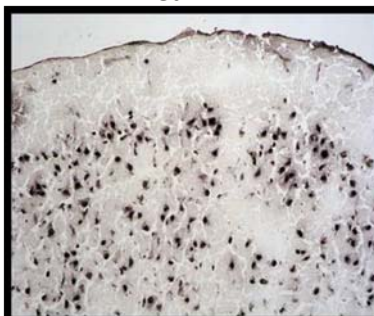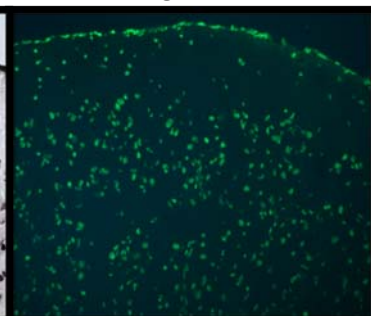

Supplement: MOESM4 [file 9600958]
